# Supplementary material for: Distinct mechanisms mediate X chromosome dosage compensation in Anopheles and Drosophila
Source: Life Sci Alliance. 2021 Jul 15;4(9):e202000996. doi: 10.26508/lsa.202000996 (PMC8321682; doi:10.26508/lsa.202000996)
Supplement: Supplementary file 1 [file LSA-2020-00996_TableS1.xls]

## Sheet: BLAST
MSL protein	Domain	Amino acids	Uniprot	Sequence	A. gambiae orthologue	Blast details
MSL1	overall	1-1039	P50535	MDKRFKWPPKKRANYLESPYPHIPSRGRQRNLHGHPNQTQHLHQHPGKIYERQQYGNGRG GHGGGNNNYRKLLHSLPAEHGGGAMAPPSSGGTVCAGADMVKLISENNNLRRMVMLNLNL MQEQTDSIAAKDKELDDQSAKMSVVKAQNEELKQAVAQLEAANQELCKQLRRKNQRRNDN DDDDDDPPLPPAAPQQKLIRCHAETQTVFREREQGTQTIDAQPQFANALPRGINMKESPA LDHHAGAVTNQPASKRSESKGRGEFNGKKVSTFILQRMNQDFEHHIHEQTEVAEEHEMEA HKEQISQEEDQLVAEEDHLHMQEVHTEEVVGGDIFHDALESIEMEVVTEELVDMEEHGQS VDANGHIEEDDDEDDEDDENSDKDDDSEEDDYP…	No hits found
	Coiled coil	101-155		VKLISENNNL RRMVMLNLNL MQEQTDSIAA KDKELDDQSA KMSVVKAQNEELKQA	AGAP005288	Score = 26.9 bits (58), Expect = 0.47, Method: Composition-based stats. Identities = 12/32 (38%), Positives = 19/32 (59%), Gaps = 0/32 (0%)
	PEHE	846-973		CDNEFFLEEADELL ADNPSLEIPK WRDVPVPPSS DKIDTELLSD ATFERRHQKYVKDEVDRKCR DARYMKEQIR LEQLRMRRNQ DEVLVALDPL RASTFYPLPE DIEAIQFVNE VTVQAFGENV VNM	AGAP008639	Score = 26.9 bits (58), Expect = 3.5, Method: Composition-based stats. Identities = 10/35 (29%), Positives = 19/35 (54%), Gaps = 0/35 (0%)
MSL2	overall	1-773	P50534	MAQTAYLKVTRIAMRSASNLSKRRVEELNSGLGELRQLLSCVVCCQLLVDPYSPKGKRCQ HNVCRLCLRGKKHLFPSCTQCEGCSDFKTYEENRMMAAQLLCYKTLCVHLLHSALFGELA GMRPQVARELVPRIKLPPKTTQEFIREGSNISDTFDIFLPQPDLPFLKDMPTSLPAETPP TSAVTTPELPYDHHLNISDIEAEAAATAEQGHFSPLPLLPTGSRMGMLSHAGQIVIATES SESGFMDQAWTDQVDLSGTVSVSKYTNSGNNFAVSYVMPTSATTKFDPQELQIGQVVQMA DSTQLAVLAAVEETVETSTQLTVLSTTVEETVETSTQLEVLTSAEEPNEISDQLANLQVE ESDEALVEETVEEAEGTSIPSEVVAEHMEEDQH…	AGAP000533	Score = 86.3 bits (212), Expect = 2e-17, Method: Compositional matrix adjust. Identities = 47/144 (33%), Positives = 70/144 (49%), Gaps = 16/144 (11%)
	RING	1-116		MAQTAYLKVT RIAMRSASNL SKRRVEELNS GLGELRQLLS CVVCCQLLVDPYSPKGKRCQ HNVCRLCLRG KKHLFPSCTQ CEGCSDFKTY EENRMMAAQL LCYKTLCVHL LHSALF	AGAP000533	Score = 70.9 bits (172), Expect = 6e-15, Method: Compositional matrix adjust. Identities = 37/86 (43%), Positives = 54/86 (63%), Gaps = 3/86 (3%)
	CXC	525-561		CRCGIS GSSNTLTTCR NSRCPCYKSYNSCAGCHCVC C	AGAP000533	Score = 38.5 bits (88), Expect = 6e-05, Method: Composition-based stats. Identities = 16/37 (43%), Positives = 18/37 (49%), Gaps = 0/37 (0%)
MSL3	overall	1-512	P50536	MTELRDETPLFHKGEIVLCYEPDKSKARVLYTSKVLNVFERRNEHGLRFYEYKIHFQGWR PSYDRCVRATVLLKDTEENRQLQRELAEAAKLQIRGDYSYKGTPDKPSAKKKRGGKAAHV EEPIVVPMDTGHLEAEHEMAPTPRAAGNRTRDNSGGKRKEKPPSGDGRLKGNRGRQTETF YNNAINDVSVYNHVPQEDRIMMRVSERLRELIEYDRNMIKVLGKQHALPARVPIVTIMEN FVKQQAVELAISIKQDSSRARNTQSRNARMEREYDRVMSTVCMLKEVVDGLRIYFEFHVD DHLLYTEEKEYVHNYLTDDNMRNCSLILNKSYEYINPSGDTELIGLDGTPVVEGSGDTNG QIGVINIGGPEYEKQLQKCLLYIVTASGKNTAQ…	AGAP001917	Score = 164 bits (416), Expect = 2e-44, Method: Compositional matrix adjust. Identities = 117/348 (34%), Positives = 178/348 (51%), Gaps = 52/348 (15%)
	CD	37-96		NVFE RRNEHGLRFY EYKIHFQGWR PSYDRCVRAT VLLKDTEENR QLQRELAEAA KLQIRG	AGAP001917	Score = 65.5 bits (158), Expect = 5e-14, Method: Compositional matrix adjust. Identities = 31/55 (56%), Positives = 40/55 (73%), Gaps = 0/55 (0%)
	MRG	199-488		RIMMRVSERLRELIEYDRNMIKVLGKQHALPARVPIVTIMEN FVKQQAVELAISIKQDSSRARNTQSRNARMEREYDRVMSTVCMLKEVVDGLRIYFEFHVD DHLLYTEEKEYVHNYLTDDNMRNCSLILNKSYEYINPSGDTELIGLDGTPVVEGSGDTNG QIGVINIGGPEYEKQLQKCLLYIVTASGKNTAQAYERTSPYTAAYKLPVEMRGFLNETFK WRLLSAESPPEKSMVFGAPHLVRLMIKMPMFLNASPISNKKLEDLLPHLDAFINYLENHR EWFDRENF	AGAP001917	Score = 81.6 bits (200), Expect = 2e-17, Method: Compositional matrix adjust. Identities = 43/137 (31%), Positives = 83/137 (61%), Gaps = 4/137 (3%)
MOF	overall	1-827	O02193	MSEAELEQTPSAGHVQEQPIEEEHEPEQEPTDAYTIGGPPRTPVEDAAAELSASLDVSGS DQSAEQSLDLSGVQAEAAAESEPPAKRQHRDISPISEDSTPASSTSTSSTRSSSSSRYDD VSEAEEAPPEPEPEQPQQQQQEEKKEDGQDQVKSPGPVELEAQEPAQPQKQKEVVDQEIE TEDEPSSDTVICVADINPYGSGSNIDDFVMDPDAPPNAIITEVVTIPAPLHLKGTQQLGL PLAAPPPPPPPPAAEQVPETPASPTDDGEEPPAVYLSPYIRSRYMQESTPGLPTRLAPRD PRQRNMPPPAVVLPIQTVLSANVEAISDDSSETSSSDDDEEEEEDEDDALTMEHDNTSRE TVITTGDPLMQKIDISENPDKIYFIRREDGTVH…	AGAP012229	Score = 549 bits (1415), Expect = 0.0, Method: Compositional matrix adjust. Identities = 272/448 (61%), Positives = 328/448 (73%), Gaps = 22/448 (5%)
	CB	367-435		DPLM QKIDISENPD KIYFIRREDG TVHRGQVLQS RTTENAAAPD EYYVHYVGLN RRLDGWVGRH RISDN	AGAP012229	Score = 60.1 bits (144), Expect = 5e-12, Method: Compositional matrix adjust. Identities = 27/51 (53%), Positives = 35/51 (69%), Gaps = 0/51 (0%)
	HAT	541-813		KYIDKLQFGN YEIDTWYFSP FPEEYGKART LYVCEYCLKY MRFRSSYAYH LHECDRRRPP GREIYRKGNI SIYEVNGKEE SLYCQLLCLM AKLFLDHKVL YFDMDPFLFY ILCETDKEGS HIVGYFSKEK KSLENYNVAC ILVLPPHQRK GFGKLLIAFS YELSRKEGVI GSPEKPLSDL GRLSYRSYWA YTLLELMKTR CAPEQITIKE LSEMSGITHD DIIYTLQSMK MIKYWKGQNV ICVTSKTIQD HLQLPQFKQP KLTIDTDYLV WSP	AGAP012229	Score = 426 bits (1094), Expect = 1e-146, Method: Compositional matrix adjust. Identities = 198/273 (73%), Positives = 228/273 (84%), Gaps = 3/273 (1%)
MLE	overall	1-1293	P24785	MDIKSFLYQFCAKSQIEPKFDIRQTGPKNRQRFLCEVRVEPNTYIGVGNSTNKKDAEKNA CRDFVNYLVRVGKLNTNDVPADAGASGGGPRTGLEGAGMAGGSGQQKRVFDGQSGPQDLG EAYRPLNHDGGDGGNRYSVIDRIQEQRDMNEAEAFDVNAAIHGNWTIENAKERLNIYKQT NNIRDDYKYTPVGPEHARSFLAELSIYVPALNRTVTARESGSNKKSASKSCALSLVRQLF HLNVIEPFSGTLKKKKDEQLKPYPVKLSPNLINKIDEVIKGLDLPVVNPRNIKIELDGPP IPLIVNLSRIDSSQQDGEKRQESSVIPWAPPQANWNTWHACNIDEGELATTSIDDLSMDY ERSLRDRRQNDNEYRQFLEFREKLPIAAMRSEI…	AGAP006599	Score = 1389 bits (3594), Expect = 0.0, Method: Compositional matrix adjust. Identities = 728/1277 (57%), Positives = 907/1277 (71%), Gaps = 45/1277 (4%)
	dsRBD	1-255		MDIKSFLYQFCAKSQIEPKFDIRQTGPKNRQRFLCEVRVEPNTYIGVGNSTNKKDAEKNA CRDFVNYLVRVGKLNTNDVPADAGASGGGPRTGLEGAGMAGGSGQQKRVFDGQSGPQDLG EAYRPLNHDGGDGGNRYSVIDRIQEQRDMNEAEAFDVNAAIHGNWTIENAKERLNIYKQT NNIRDDYKYTPVGPEHARSFLAELSIYVPALNRTVTARESGSNKKSASKSCALSLVRQLF HLNVIEPFSGTLKKK	AGAP006599	Score = 289 bits (739), Expect = 2e-89, Method: Compositional matrix adjust. Identities = 147/254 (58%), Positives = 179/254 (70%), Gaps = 10/254 (4%)
	helicase	398-999		DNPVVIIRGNTGCGKTTQIAQY ILDDYICSGQGGYANIYVTQPRRISAISVAERVARERCEQLGDTVGYSVRFESVFPRPYG AILFCTVGVLLRKLEAGLRGVSHIIVDEIHERDVNSDFLLVILRDMVDTYPDLHVILMSA TIDTTKFSKYFGICPVLEVPGRAFPVQQFFLEDIIQMTDFVPSAESRRKRKEVEDEEQLL SEDKDEAEINYNKVCEDKYSQKTRNAMAMLSESDVSFELLEALLMHIKSKNIPGAILVFL PGWNLIFALMKFLQNTNIFGDTSQYQILPCHSQIPRDEQRKVFEPVPEGVTKIILSTNIA ETSITIDDIVFVIDICKARMKLFTSHNNLTSYATVWASKTNLEQRKGRAGRVRPGFCFTL CSRARFQALE…	AGAP006599	Score = 813 bits (2100), Expect = 0.0, Method: Compositional matrix adjust. Identities = 401/610 (66%), Positives = 486/610 (80%), Gaps = 18/610 (3%)

## Sheet: RNA-seq
Sample Name	Species	Stage	Genotype	Uniquely Mapped Reads	Mapping Rate
AG_mixed_R9_gMSL2_15h_A6	Anopheles gambiae	15h embryo	msl-2 knock-out	13464281	0.8649
AG_mixed_R9_gMSL2_15h_A8	Anopheles gambiae	15h embryo	msl-2 knock-out	16105191	0.9028
AG_mixed_R9_gMSL2_24h_A12	Anopheles gambiae	24h embryo	msl-2 knock-out	14834685	0.8743
AG_mixed_R9_gMSL2_6h_A2	Anopheles gambiae	6-7h embryo	msl-2 knock-out	15197454	0.8974
AG_mixed_R9_gMSL2_7h_A10	Anopheles gambiae	6-7h embryo	msl-2 knock-out	16324833	0.8869
AG_mixed_R9_gMSL2_7h_A4	Anopheles gambiae	6-7h embryo	msl-2 knock-out	14396966	0.9056
AG_mixed_R9_wt_15h_A5	Anopheles gambiae	15h embryo	control	14081533	0.9015
AG_mixed_R9_wt_15h_A7	Anopheles gambiae	15h embryo	control	16918298	0.9092
AG_mixed_R9_wt_24h_A11	Anopheles gambiae	24h embryo	control	15240791	0.9185
AG_mixed_R9_wt_6h_A1	Anopheles gambiae	6-7h embryo	control	13868522	0.8991
AG_mixed_R9_wt_7h_A3	Anopheles gambiae	6-7h embryo	control	13301814	0.9108
AG_mixed_R9_wt_7h_A9	Anopheles gambiae	6-7h embryo	control	13312079	0.8971
DM_mixed_msl2_7_10_embryoON_C6	Drosophila melanogaster	over night collection embryo	msl-2∆7 / msl-2∆10	13405301	0.9147
DM_mixed_msl2_7_10_embryoON_C7	Drosophila melanogaster	over night collection embryo	msl-2∆7 / msl-2∆10	18741763	0.9155
DM_mixed_msl2_7_10_embryoON_C8	Drosophila melanogaster	over night collection embryo	msl-2∆7 / msl-2∆10	14667656	0.9004
DM_mixed_msl2_7_10_embryoON_C9	Drosophila melanogaster	over night collection embryo	msl-2∆7 / msl-2∆10	17467407	0.9245
DM_mixed_msl2_710_CyOGFP_embryoON_C2	Drosophila melanogaster	over night collection embryo	msl-2*/CyO-GFP	19458730	0.9318
DM_mixed_msl2_710_CyOGFP_embryoON_C3	Drosophila melanogaster	over night collection embryo	msl-2*/CyO-GFP	15389168	0.9145
DM_mixed_msl2_710_CyOGFP_embryoON_C4	Drosophila melanogaster	over night collection embryo	msl-2*/CyO-GFP	16163858	0.9393
DM_mixed_msl2_710_CyOGFP_embryoON_C5	Drosophila melanogaster	over night collection embryo	msl-2*/CyO-GFP	15829691	0.9236

## Sheet: Statistics_Fig1
mRNA (oligo dT primers)							Wilcoxon rank sum test
Figure 1E							Figure S1D
Wilcoxon rank sum test							Wilcoxon rank sum test
msl-2							msl-2-RB
W = 4, p-value = 0.09524							W = 4, p-value = 0.6286
alternative hypothesis: true location shift is not equal to 0							alternative hypothesis: true location shift is not equal to 0
msl-3							msl-2-RA
W = 7, p-value = 0.3095							W = 2, p-value = 0.2286
alternative hypothesis: true location shift is not equal to 0							alternative hypothesis: true location shift is not equal to 0
mle							msl-3
W = 2, p-value = 0.03175							W = 2, p-value = 0.2286
alternative hypothesis: true location shift is not equal to 0							alternative hypothesis: true location shift is not equal to 0
mof							mle
W = 2, p-value = 0.03175							W = 0, p-value = 0.04975
alternative hypothesis: true location shift is not equal to 0							alternative hypothesis: true location shift is not equal to 0
AGAP000634							mof
W = 20, p-value = 0.1508							W = 5, p-value = 0.8571
alternative hypothesis: true location shift is not equal to 0							alternative hypothesis: true location shift is not equal to 0
GPRMTH2							msl-1-RA
W = 0, p-value = 0.007937							W = 3, p-value = 0.4
alternative hypothesis: true location shift is not equal to 0							alternative hypothesis: true location shift is not equal to 0
Rps4							msl-1-RB
W = 19, p-value = 0.2222							W = 2, p-value = 0.2286
alternative hypothesis: true location shift is not equal to 0							alternative hypothesis: true location shift is not equal to 0
Rp49							roX2
W = 19, p-value = 0.2222							W = 0, p-value = 0.05714
alternative hypothesis: true location shift is not equal to 0							alternative hypothesis: true location shift is not equal to 0
RPL19
W = 6, p-value = 0.2222
alternative hypothesis: true location shift is not equal to 0

## Sheet: Statistics_Fig3C_F
Drosophila RNA-seq
Normalization	Standard DESeq2					Wilcoxon signed rank test with continuity correction										Wilcoxon rank sum test with continuity correction
Chromosome	mean log2FC	median log2FC	test	p-value												two-sided, comparison to chrX
2L	0.0471494	0.016777	>0	1.779e-06		V = 2038703, p-value = 1.779e-06					alternative hypothesis: true location is greater than 0					W = 4449245, p-value < 2.2e-16		9.76829e-152	alternative hypothesis: true location shift is not equal to 0
2R	0.0592985	0.0306652	>0	3.028e-14		V = 2613639, p-value = 3.028e-14					alternative hypothesis: true location is greater than 0					W = 4968148, p-value < 2.2e-16		7.50458e-170	alternative hypothesis: true location shift is not equal to 0
3L	0.0721002	0.0249037	>0	2.188e-15		V = 2580910, p-value = 2.188e-15					alternative hypothesis: true location is greater than 0					W = 5038843, p-value < 2.2e-16		2.44725e-196	alternative hypothesis: true location shift is not equal to 0
3R	0.0834017	0.0318764	>0	1.52609e-28		V = 3843102, p-value < 2.2e-16				1.52609e-28	alternative hypothesis: true location is greater than 0					W = 6082204, p-value < 2.2e-16		4.94886e-223	alternative hypothesis: true location shift is not equal to 0
X	-0.157967	-0.213655	<0	7.50323e-149		V = 489569, p-value < 2.2e-16			7.5e-149	7.50323e-149	alternative hypothesis: true location is less than 0
Normalization	rRNA
Chromosome	mean log2FC	median log2FC	test	p-value
2L	0.0524385	0.0499239	>0	7.63046e-10		V = 2096260, p-value = 7.63e-10				7.63046e-10	alternative hypothesis: true location is greater than 0
2R	0.119626	0.0672342	>0	1.29351e-24		V = 2740443, p-value < 2.2e-16				1.29351e-24	alternative hypothesis: true location is greater than 0
3L	0.165378	0.061512	>0	4.07582e-30		V = 2744809, p-value < 2.2e-16				4.07582e-30	alternative hypothesis: true location is greater than 0
3R	0.145181	0.0684631	>0	7.62957e-45		V = 4025867, p-value < 2.2e-16				7.62957e-45	alternative hypothesis: true location is greater than 0
X	-0.141761	-0.24892	<0	1.44666e-79		V = 714309, p-value < 2.2e-16				1.44666e-79	alternative hypothesis: true location is less than 0
Anopheles RNA-seq
Normalization	Standard DESeq2
Chromosome	mean log2FC	median log2FC	test	p-value
2L	-0.00974869	0.0136351	>0	0.08842		V = 1926520, p-value = 0.08842					alternative hypothesis: true location is greater than 0					W = 1490949, p-value = 0.01289			alternative hypothesis: true location shift is not equal to 0
2R	-0.0453015	-0.00458981	>0	0.9516		V = 3041421, p-value = 0.9516					alternative hypothesis: true location is greater than 0					W = 1875958, p-value = 0.2897			alternative hypothesis: true location shift is not equal to 0
3L	-0.0044336	0.0015049	>0	0.3793		V = 1039874, p-value = 0.3793					alternative hypothesis: true location is greater than 0					W = 1096402, p-value = 0.0559			alternative hypothesis: true location shift is not equal to 0
3R	-0.0027907	0.0241615	>0	0.009702		V = 1599722, p-value = 0.009702					alternative hypothesis: true location is greater than 0					W = 1357874, p-value = 0.002636			alternative hypothesis: true location shift is not equal to 0
X	-0.0590444	-0.0173285	<0	0.01741		V = 248252, p-value = 0.01741					alternative hypothesis: true location is less than 0
